# Supplementary material for: 2D Sheet-like architectures constructed from main-group metal ions, 4,4′-bpno and 1,2-alternate p-sulfonatothiacalix[4]arene
Source: Royal Society of Chemistry journal article supplement (doi:10.1039/c1dt11239b), 2011-11-01
Supplement: c1dt11239b.pdf [file c1dt11239b.pdf]

## Supplementary Information

### **2D Sheet-like architectures constructed from main group metal ions, 4,4'-bpno and 1,2-alternate *p*-sulfonatothiacalix[4]arene †**

**Kecai Xiong,<sup>ab</sup> Feilong Jiang,<sup>a</sup> Ming Yang,<sup>ab</sup> Mingyan Wu,<sup>a</sup> Rui Feng,<sup>ab</sup> Wentao Xu<sup>ab</sup> and  
Maochun Hong<sup>\*a</sup>**

<sup>a</sup>State Key Laboratory of Structure Chemistry, Fujian Institute of Research on the Structure of Matter, Chinese Academy of Sciences, Fuzhou, 350002, China.

<sup>b</sup> Graduate School of the Chinese Academy of Sciences, Beijing, 100049, China.

- Corresponding author:

E-mail: *hmc@fjirsm.ac.cn*.

Tel: +86-591-83714605; Fax: +86-591 / 8379 4946

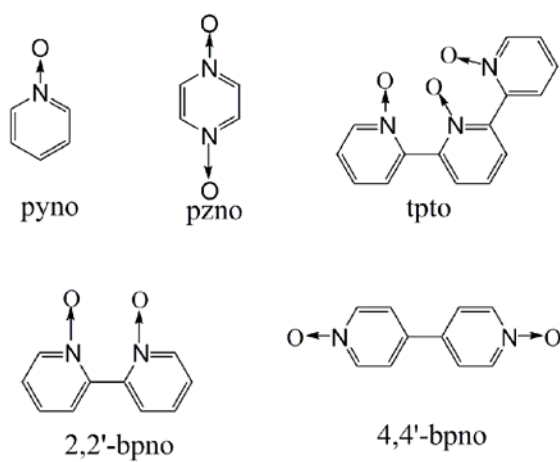

**Fig. S1** The structures of pyridine *N*-oxide derivatives.

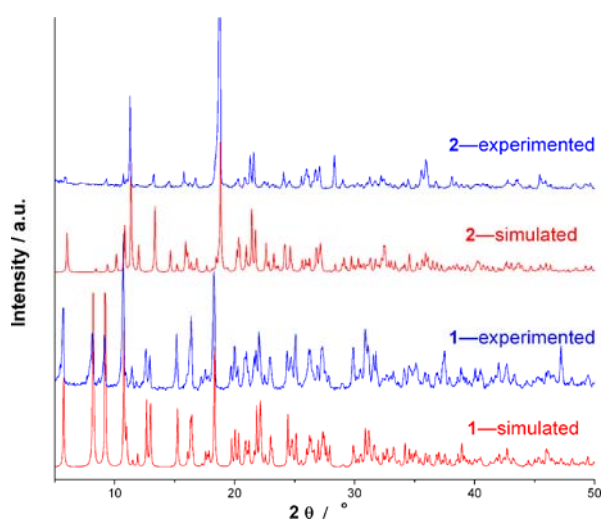

**Fig. S2** PXRD of complexes **1** and **2**.
